# Supplementary material
Source: PubMed Central journal article supplement (PMC11028444)
Supplement: 262_2013_1475_MOESM1_ESM.pdf [file 262_2013_1475_MOESM1_ESM.pdf]

| Online Resource 1. Clinical characteristics of patients in the functional analysis. |                      |                                        |                     |
|-------------------------------------------------------------------------------------|----------------------|----------------------------------------|---------------------|
| <b>Stage of disease at blood draw<sup>a</sup></b>                                   | <b># of patients</b> | <b>Average age (range)<sup>b</sup></b> | <b>Gender (M/F)</b> |
| Healthy donor                                                                       | 11                   | 45.9 (28-67)                           | 4/7                 |
| I                                                                                   | 10                   | 58.6 (42-73)                           | 3/7                 |
| IV                                                                                  | 11                   | 54.8 (38-87)                           | 8/3                 |

Eligible patients were diagnosed with Stage I or Stage IV melanoma.  
<sup>a</sup>All patients enrolled in the study. <sup>b</sup>Age at blood draw.

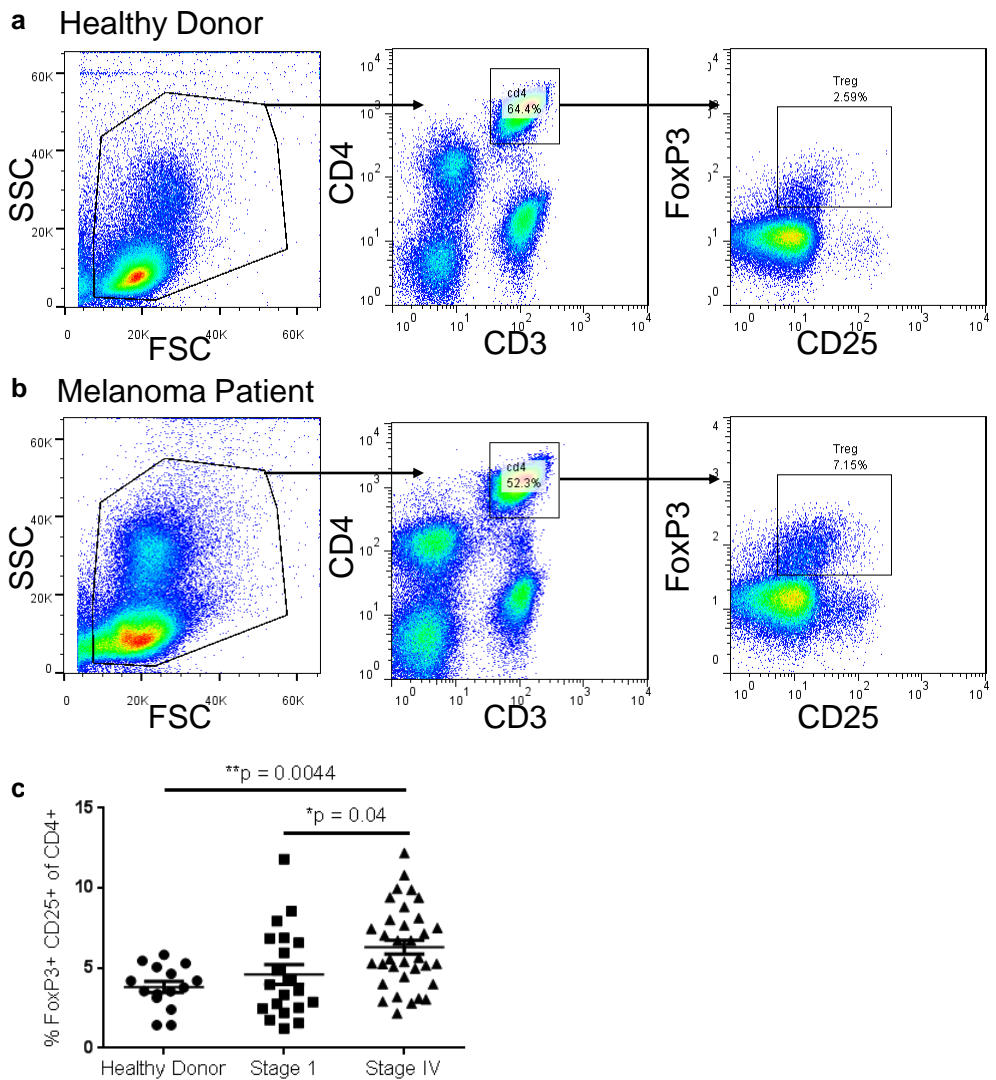

**Online Resource 2. Regulatory T cells are increased in melanoma patients.** PBMCs from healthy donors (**a**) or melanoma patients (**b**) were stained with antibodies specific for CD3, CD4, CD8, CD25, and FoxP3 and analyzed by flow cytometry. The gating scheme used to analyze T<sub>regs</sub> is shown. Gates were set using isotype control antibodies. **c.** The frequency of T<sub>regs</sub> was compared between healthy donors, Stage I melanoma patients, and Stage IV melanoma patients using one-way ANOVA ( $p = 0.0026$ ) followed by a Tukey's Multiple Comparison test ( $p$  values shown).

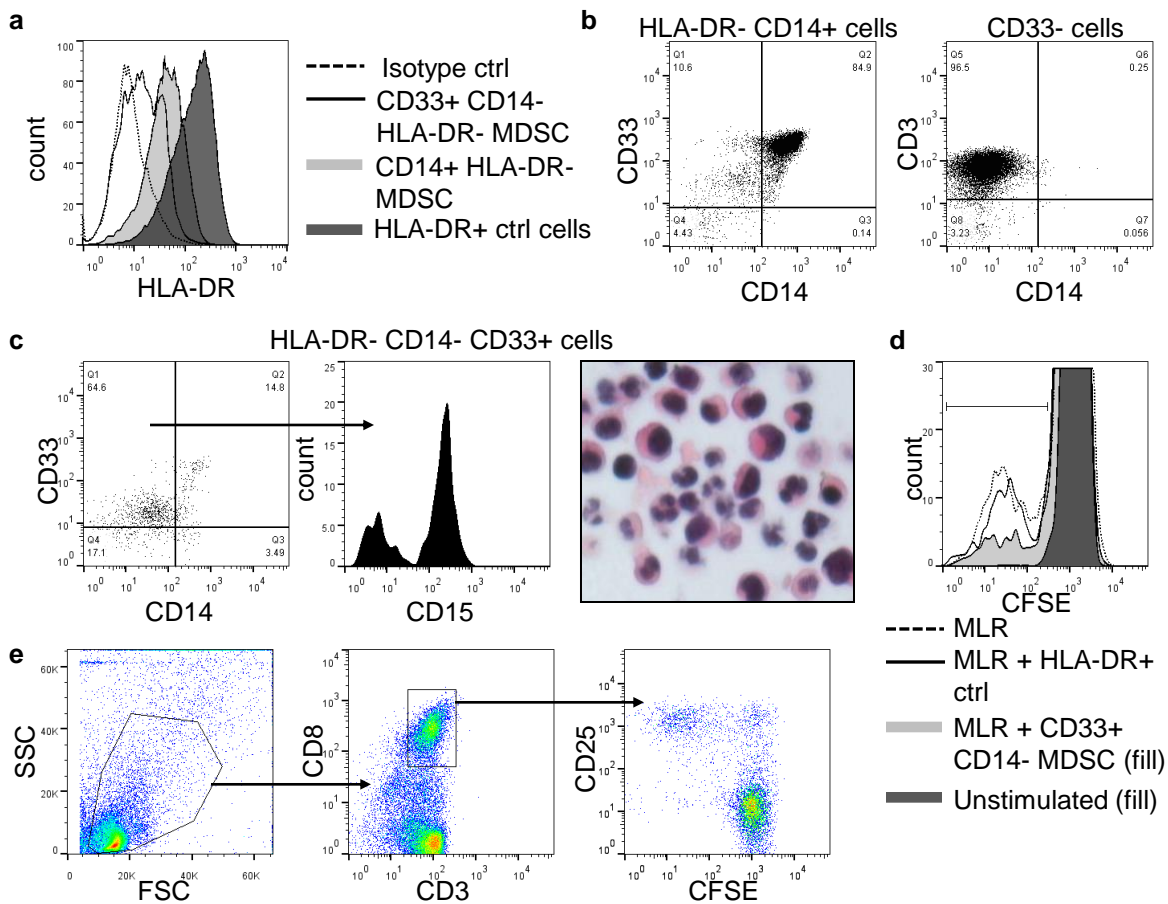

### Online Resource 3. Magnetic separations of MDSCs and gating scheme for T cell

**functional assays.** **a.** Expression of HLA-DR on magnetically separated cells used in the T cell suppression assays. **b.** Post-sort analysis of HLA-DR- CD14+ cells (80-90% CD14+) and CD33- CD14- HLA-DR- cells (greater than 90% T cells) used in the suppression assays. **c.** CD33+ CD14- HLA-DR- MDSCs used in suppression assays are a mixed population of CD15- and granulocytic CD15+ cells, analyzed by flow cytometry (left, 60-70% CD14- CD33+ MDSCs), and morphologically by hematoxylin and eosin staining of paraffin imbedded cells (right). **d.** CFSE-labeled CD33- cells (shown in **b**) from fresh PBMC samples were incubated with dendritic cells from an unrelated healthy donor in a mixed lymphocyte reaction (MLR). After 4 days, the frequency of divided CD3+ CD8+ T cells was determined using the gating scheme shown in **(e)** in the presence or absence of HLA-DR+ control cells or MDSCs. **e.** Gating scheme used to determine the frequency of divided cells and the CD25 MFI in the T cell suppression assays.

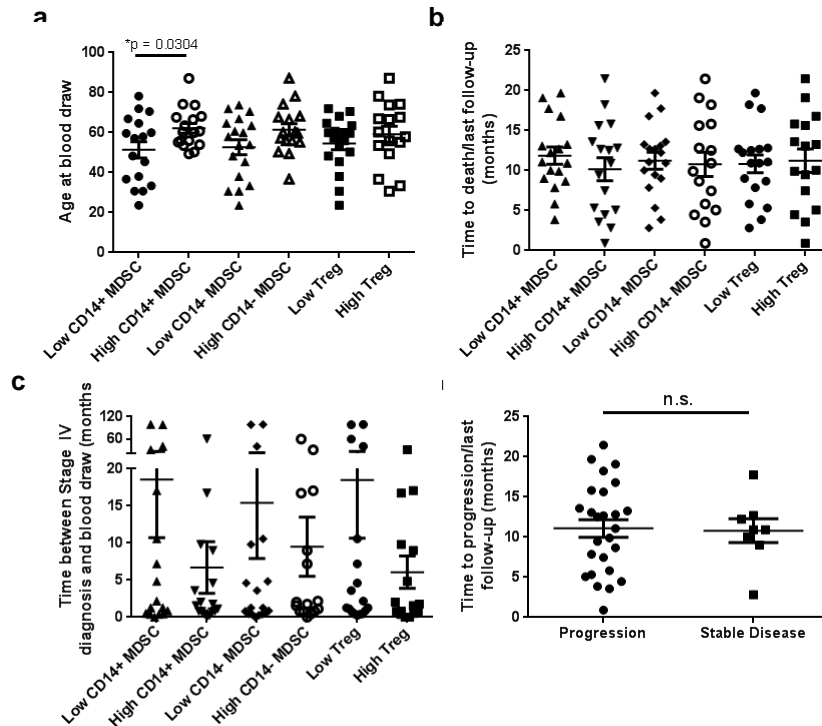

**Online Resource 4. Patients with “Low” or “High” frequencies of CD14- MDSCs have similar clinical characteristics and follow-up times.** **a.** The average age of patients with a high or average/low frequency of MDSCs and Tregs were compared using a Student’s *t* test. **b.** The average follow-up time was compared for patients with a high or low frequency of MDSCs and Tregs. **c.** The average time between Stage IV diagnosis and blood draw was compared between patients with a high or low frequency of MDSCs. **d.** The average follow-up time was compared between patients that progressed during the study and those with stable disease.

Online Resource 5. A high frequency CD14<sup>-</sup> MDSCs independently predicts a significant increase in the risk of death and disease progression in Stage IV melanoma patients.

| <i>Overall Survival</i>                                                                                                                                                                                                                                                                                                                                                                                                                                                                                                                                                                                                                                                                                                                                                                                  |                                    |                     |                         |
|----------------------------------------------------------------------------------------------------------------------------------------------------------------------------------------------------------------------------------------------------------------------------------------------------------------------------------------------------------------------------------------------------------------------------------------------------------------------------------------------------------------------------------------------------------------------------------------------------------------------------------------------------------------------------------------------------------------------------------------------------------------------------------------------------------|------------------------------------|---------------------|-------------------------|
| Variable                                                                                                                                                                                                                                                                                                                                                                                                                                                                                                                                                                                                                                                                                                                                                                                                 | Univariate Analysis <sup>a</sup>   |                     | Mean follow-up time (m) |
|                                                                                                                                                                                                                                                                                                                                                                                                                                                                                                                                                                                                                                                                                                                                                                                                          | HR                                 | (95% CI) p value    |                         |
| CD14 <sup>-</sup>                                                                                                                                                                                                                                                                                                                                                                                                                                                                                                                                                                                                                                                                                                                                                                                        |                                    |                     |                         |
| High                                                                                                                                                                                                                                                                                                                                                                                                                                                                                                                                                                                                                                                                                                                                                                                                     | 4.83                               | (1.34 – 17.5) 0.016 | 10.8                    |
| Low                                                                                                                                                                                                                                                                                                                                                                                                                                                                                                                                                                                                                                                                                                                                                                                                      | 1.0                                |                     | 11.2                    |
| <i>Time to Progression</i>                                                                                                                                                                                                                                                                                                                                                                                                                                                                                                                                                                                                                                                                                                                                                                               |                                    |                     |                         |
| Variable                                                                                                                                                                                                                                                                                                                                                                                                                                                                                                                                                                                                                                                                                                                                                                                                 | Multivariate Analysis <sup>b</sup> |                     | Mean follow-up time (m) |
|                                                                                                                                                                                                                                                                                                                                                                                                                                                                                                                                                                                                                                                                                                                                                                                                          | HR                                 | (95% CI) p value    |                         |
| CD14 <sup>-</sup>                                                                                                                                                                                                                                                                                                                                                                                                                                                                                                                                                                                                                                                                                                                                                                                        |                                    |                     |                         |
| High                                                                                                                                                                                                                                                                                                                                                                                                                                                                                                                                                                                                                                                                                                                                                                                                     | 2.39                               | (1.04 – 5.56) 0.039 | 5.5                     |
| Low                                                                                                                                                                                                                                                                                                                                                                                                                                                                                                                                                                                                                                                                                                                                                                                                      | 1.0                                |                     | 7.8                     |
| CD14 <sup>+</sup>                                                                                                                                                                                                                                                                                                                                                                                                                                                                                                                                                                                                                                                                                                                                                                                        |                                    |                     |                         |
| High                                                                                                                                                                                                                                                                                                                                                                                                                                                                                                                                                                                                                                                                                                                                                                                                     | 2.10                               | (0.9 – 4.80) 0.089  | 5.3                     |
| Low                                                                                                                                                                                                                                                                                                                                                                                                                                                                                                                                                                                                                                                                                                                                                                                                      | 1.0                                |                     | 8.0                     |
| <p>Overall survival and time to progression were analyzed for all Stage IV patients. <sup>a</sup>Gender, categorical age (&lt;58 or ≥ 58), prior treatments (chemo/radiation, immunotherapy, biologic therapy), frequency of CD14<sup>+</sup> MDSCs and T<sub>regs</sub>, stage of initial diagnosis, time from Stage IV diagnosis to blood draw, and BRAF mutation status were not univariately significant and therefore not included in a multivariate model for overall survival. <sup>b</sup>Gender, categorical age (&lt;58 or ≥ 58), prior treatments, frequency of T<sub>regs</sub>, stage of initial diagnosis, time from Stage IV diagnosis to blood draw, and BRAF mutation status were not univariately significant and therefore not included in a final model for time to progression.</p> |                                    |                     |                         |
